# Supplementary material
Source: Elsevier journal article supplement (https://www.sciencedirect.com/science/article/pii/S0001731015004561)
Supplement: mmc1 [file S0001731015004561:mmc1.pdf]

**Tabla s1 (material suplementario):** Niveles de evidencia y grados de recomendación para preguntas que no traten de diagnóstico<sup>11</sup>

| Niveles de evidencia científica |                                                                                                                                                                                                        | Grados de recomendación                   |                                                                                                                                                                                                                                                                        |
|---------------------------------|--------------------------------------------------------------------------------------------------------------------------------------------------------------------------------------------------------|-------------------------------------------|------------------------------------------------------------------------------------------------------------------------------------------------------------------------------------------------------------------------------------------------------------------------|
| 1++                             | Metaanálisis de alta calidad, RS de EC o EC de alta calidad con muy poco riesgo de sesgo.                                                                                                              | A                                         | Al menos un metaanálisis, RS o EC clasificado como 1++ y directamente aplicable a la población diana de la guía; o un volumen de evidencia científica compuesto por estudios clasificados como 1+ y con gran consistencia entre ellos.                                 |
| 1+                              | Metaanálisis bien realizados, RS de EC o EC bien realizados con poco riesgo de sesgos.                                                                                                                 |                                           |                                                                                                                                                                                                                                                                        |
| 1-                              | Metaanálisis, RS de EC o EC con alto riesgo de sesgos.                                                                                                                                                 | No se recomienda realizar recomendaciones |                                                                                                                                                                                                                                                                        |
| 2++                             | RS de alta calidad de estudios de cohortes o de casos y controles. Estudios de cohortes o de casos y controles con riesgo muy bajo de sesgo y con alta probabilidad de establecer una relación causal. | B                                         | Un volumen de evidencia científica compuesta por estudios clasificados como 2 ++, directamente aplicable a la población diana de la guía y que demuestran gran consistencia entre ellos; o evidencia científica extrapolada desde estudios clasificados como 1 ++ ó 1+ |
| 2+                              | Estudios de cohortes o de casos y controles bien realizados con bajo riesgo de sesgo y con una moderada probabilidad de establecer una relación causal.                                                | C                                         | Un volumen de evidencia científica compuesta por estudios clasificados como 2 + directamente aplicables a la población diana de la guía y que demuestran gran consistencia entre ellos; o evidencia científica extrapolada desde estudios clasificados como 2 ++       |

|    |                                                                                                                               |                                                  |                                                                                                               |
|----|-------------------------------------------------------------------------------------------------------------------------------|--------------------------------------------------|---------------------------------------------------------------------------------------------------------------|
| 2- | Estudios de cohortes o de casos y controles con alto riesgo de sesgo y riesgo significativo de que la relación no sea causal. | <i>No se recomienda realizar recomendaciones</i> |                                                                                                               |
| 3  | Estudios no analíticos, como informes de casos y series de casos.                                                             | D                                                | Evidencia científica de nivel 3 ó 4; o evidencia científica extrapolada desde estudios clasificados como 2+   |
| 4  | Opinión de expertos.                                                                                                          |                                                  |                                                                                                               |
|    |                                                                                                                               | ✓                                                | Buena práctica clínica recomendada en base a la experiencia clínica del grupo que ha desarrollado el consenso |

RS: revisión/es sistemática/s; EC: ensayo/s clínico/s

**Tabla s2 (material suplementario): Niveles de evidencia y grados de recomendación para preguntas sobre diagnóstico<sup>11</sup>**

| <b>Niveles de evidencia científica</b> | <b>Tipo de evidencia científica</b>                                  | <b>Tipos de estudios</b>                                                                                                                                                                                                                                                                                                                            | <b>Grados de recomendación</b> |
|----------------------------------------|----------------------------------------------------------------------|-----------------------------------------------------------------------------------------------------------------------------------------------------------------------------------------------------------------------------------------------------------------------------------------------------------------------------------------------------|--------------------------------|
| Ia                                     | Revisión sistemática con homogeneidad de estudios de Nivel 1.        | Nivel 1. Cumplen:<br>- Comparación enmascarada con una prueba de referencia ("patrón oro") válida.<br>- Espectro adecuado de pacientes.                                                                                                                                                                                                             | A                              |
| Ib                                     | Estudios de nivel 1                                                  |                                                                                                                                                                                                                                                                                                                                                     |                                |
| II                                     | Estudios de nivel 2.<br>Revisión sistemática de estudios de nivel 2. | Nivel 2. Presentan sólo uno de estos sesgos:<br>- Población no representativa (la muestra no refleja la población donde se aplicará la prueba).<br>- Comparación con el patrón de referencia ("patrón oro") inadecuado (la prueba que se evaluará forma parte del patrón oro o el resultado de la prueba influye en la realización del patrón oro). | B                              |

|     |                                                                      |                                                                                                                    |   |
|-----|----------------------------------------------------------------------|--------------------------------------------------------------------------------------------------------------------|---|
|     |                                                                      | <ul style="list-style-type: none"> <li>- Comparación no enmascarada.</li> <li>- Estudios casos-control.</li> </ul> |   |
| III | Estudios de nivel 3.<br>Revisión sistemática de estudios de nivel 3. | Nivel 3. Presentan dos o más de los criterios descritos en los estudios de nivel 2                                 | C |
| IV  | Consenso, opiniones de expertos sin valoración crítica explícita.    |                                                                                                                    | D |

RS: revisión sistemática
